# Supplementary material
Source: Springer Nature journal article supplement (https://www.springermedizin.de/resource/supplementary/12950_2009_109_MOESM1_ESM.pdf/9557984)

**A**

IL-8 mRNA

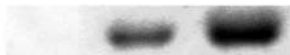

18s rRNA

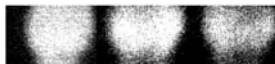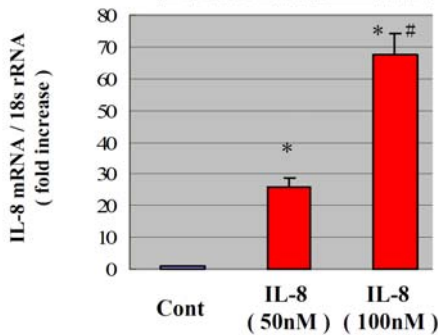

\*  $p < 0.01$  vs. control  
 #  $p < 0.05$  vs. IL-8 50nM

**B**

IL-8 mRNA

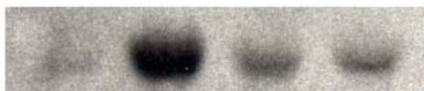

18s rRNA

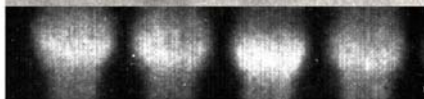

IL-8 ( 100 nM, 18h )

-            +            +            +

PD98059 ( 50  $\mu$  M, 2h )

-            -            +            -

SB203580 ( 50  $\mu$  M, 2h )

-            -            -            +

Supplement: MOESM1 [file 9557984]
